# Supplementary material
Source: MDPI journal article supplement (https://www.mdpi.com/2076-3263/9/4/166)
Supplement: s1 [file s1]

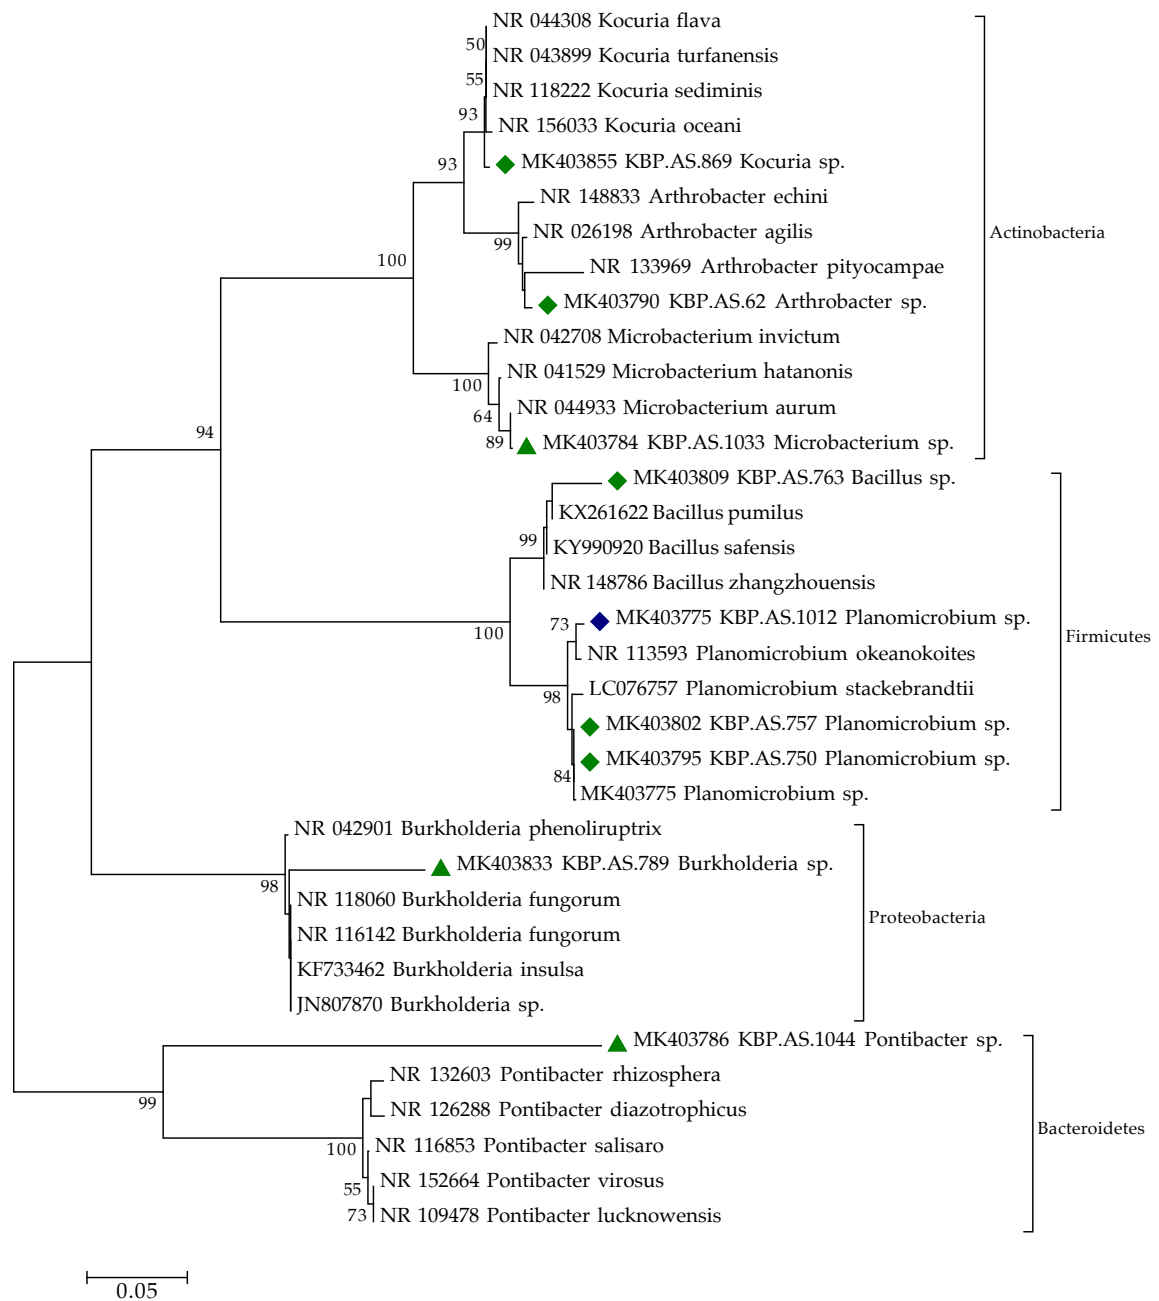

**Figure S3.** Phylogenetic analysis tree of 16S rRNA genes of the strains isolated from the Mojave Desert soil, which were sequenced using 805r primer. The tree was constructed using the Neighbor-Joining method with the use of the most closely related sequences from GenBank. The number of taxa—35. The number of significant characters—320. The number of bootstrap replicates—500. Confidence values of branching are given for cases of 50% and higher. Rhombus indicate strains isolated on the PYG media, triangles—isolated on the CM media; green and blue colors indicate strains isolated at 25 and 10°C, respectively. The scale under the tree indicates the number of phylogenetical significant changes of nucleotides.
