# Supplementary material
Source: MDPI journal article supplement (https://www.mdpi.com/2076-3263/9/4/166)
Supplement: s1 [file s1]

**Table S1.** Physiological characteristics of isolated bacteria.

| Strain     | Taxonomic affiliation                 | Temperature,<br>°C | pH   | Maximum salt concentration, % |     |                   |                    |                                    |
|------------|---------------------------------------|--------------------|------|-------------------------------|-----|-------------------|--------------------|------------------------------------|
|            |                                       |                    |      | NaCl                          | KCl | MgSO <sub>4</sub> | NaHCO <sub>3</sub> | Mg(ClO <sub>4</sub> ) <sub>2</sub> |
|            | <i>Pseudarthrobacter oxydans</i>      | 25-37              | 7-12 | 20                            | 20  | 20                | 15                 | 15                                 |
| KBP.AS.17  |                                       |                    |      |                               |     |                   |                    |                                    |
| KBP.AS.62  | <i>Arthrobacter</i> sp.               | 10-45              | 4-12 | 20                            | 20  | 20                | 2                  | 15                                 |
| KBP.AS.75  | <i>Brachybacterium</i> sp.            | 10-25              | 6-12 | 20                            | 20  | 20                | 20                 | 10                                 |
|            | <i>Janthinobacterium</i> sp.          |                    |      |                               |     |                   |                    |                                    |
| KBP.AS.105 |                                       | 2-25               | 6-12 | 15                            | 15  | <2                | <2                 | <0.5                               |
| KBP.AS.160 | <i>Arthrobacter</i> sp.               | 2-45               | 3-12 | 20                            | 20  | 20                | 20                 | 15                                 |
|            | <i>Microbacterium aurantiacum</i>     | 25-25              | 3-12 | 15                            | 15  | 20                | <2                 | 15                                 |
| KBP.AS.747 |                                       |                    |      |                               |     |                   |                    |                                    |
| KBP.AS.748 | <i>Pseudarthrobacter</i> sp.          | 25-50              | 7-11 | <2                            | 20  | <2                | <2                 | 5                                  |
|            | <i>Brevibacterium frigiditolerans</i> | 25-50              | 7-11 | <2                            | 20  | 15                | <2                 | 5                                  |
| KBP.AS.749 |                                       |                    |      |                               |     |                   |                    |                                    |
|            | <i>Planomicrobium okeanokoites</i>    | 25-37              | 7-12 | 15                            | 15  | 20                | <2                 | 5                                  |
| KBP.AS.750 |                                       |                    |      |                               |     |                   |                    |                                    |
| KBP.AS.751 | <i>Agrococcus</i> sp.                 | 25-37              | 7-12 | 20                            | 20  | 20                | 2                  | <0.5                               |
| KBP.AS.752 | <i>Agrococcus</i> sp.                 | 2-50               | 7-11 | <2                            | 20  | <2                | <2                 | 5                                  |
| KBP.AS.753 | <i>Agrococcus</i> sp.                 | 25-37              | 7-11 | <2                            | 20  | 15                | <2                 | <0.5                               |
| KBP.AS.754 | <i>Kocuria</i> sp.                    | 25-50              | 7-11 | 15                            | 20  | 20                | <2                 | 1                                  |
|            | <i>Planomicrobium glaciei</i>         | 25-45              | 7-11 | <2                            | 20  | 15                | <2                 | 0.5                                |
| KBP.AS.755 |                                       |                    |      |                               |     |                   |                    |                                    |
|            | <i>Leucobacter aridicollis</i>        | 25-50              | 7-11 | <2                            | 20  | 20                | <2                 | 5                                  |
| KBP.AS.756 |                                       |                    |      |                               |     |                   |                    |                                    |
|            | <i>Planomicrobium okeanokoites</i>    | 10-50              | 7-11 | <2                            | 20  | 15                | <2                 | <0.5                               |
| KBP.AS.757 |                                       |                    |      |                               |     |                   |                    |                                    |
| KBP.AS.758 | <i>Microbacterium</i> sp.             | 2-45               | 4-12 | 20                            | 20  | 20                | 5                  | 15                                 |
| KBP.AS.759 | <i>Bacillus pumilus</i>               | 2-45               | 4-12 | 20                            | 20  | 20                | 5                  | 15                                 |
| KBP.AS.760 | <i>Microbacterium</i> sp.             | 2-37               | 4-11 | 20                            | 20  | 20                | 15                 | 15                                 |
| KBP.AS.761 | <i>Rufibacter</i> sp.                 | 25-25              | 7-11 | 15                            | 15  | <2                | <2                 | <0.5                               |
| KBP.AS.762 | <i>Microbacterium</i> sp.             | 25-37              | 7-11 | <2                            | 20  | <2                | <2                 | 5                                  |
| KBP.AS.763 | <i>Massilia</i> sp.                   | 25-25              | 7-12 | <2                            | <2  | 20                | <2                 | <0.5                               |
| KBP.AS.764 | <i>Bacillus</i> sp.                   | 2-50               | 7-11 | 15                            | 20  | 20                | <2                 | 15                                 |
|            | <i>Massilia alkalitolerans</i>        | 2-50               | 7-11 | <2                            | 20  | 15                | <2                 | 5                                  |
| KBP.AS.765 |                                       |                    |      |                               |     |                   |                    |                                    |
|            | <i>Pseudarthrobacter</i> sp.          | 25-50              | 7-11 | 15                            | 20  | 20                | <2                 | 15                                 |
| KBP.AS.766 |                                       |                    |      |                               |     |                   |                    |                                    |
| KBP.AS.767 | <i>Massilia varians</i>               | 10-37              | 7-11 | 15                            | 20  | 20                | <2                 | <0.5                               |

|            |                                       |       |      |    |    |    |    |      |
|------------|---------------------------------------|-------|------|----|----|----|----|------|
| KBP.AS.768 | <i>Planomicrobium</i> sp              | 2-37  | 7-11 | 20 | 20 | 15 | 15 | 15   |
| KBP.AS.769 | <i>Microbacterium pseudoresistens</i> | 25-50 | 7-11 | <2 | 20 | 20 | <2 | 0.5  |
| KBP.AS.770 | <i>Arthrobacter</i> sp.               | 2-25  | 4-11 | 20 | 20 | 20 | 2  | 15   |
| KBP.AS.771 | <i>Arthrobacter</i> sp.               | 2-37  | 7-12 | 20 | 20 | 20 | 20 | 15   |
| KBP.AS.772 | <i>Planomicrobium glaciei</i>         | 10-37 | 6-12 | 15 | 20 | 20 | <2 | <0.5 |
| KBP.AS.773 | <i>Cellulomonas</i> sp.               | 2-37  | 7-12 | 20 | 20 | 20 | 20 | 15   |
| KBP.AS.774 | <i>Planomicrobium okeanokoites</i>    | 2-37  | 4-12 | 20 | 20 | 20 | 5  | 15   |
| KBP.AS.775 | <i>Planomicrobium okeanokoites</i>    | 10-37 | 6-12 | 15 | 20 | 20 | <2 | 5    |
| KBP.AS.776 | <i>Georgenia</i> sp.                  | 2-37  | 4-12 | 20 | 20 | 20 | 15 | 15   |
| KBP.AS.777 | <i>Microbacterium barkeri</i>         | 2-37  | 4-12 | 20 | 20 | 20 | 15 | 10   |
| KBP.AS.778 | <i>Salinibacterium</i> sp.            | 25-37 | 7-11 | <2 | 15 | <2 | <2 | <0.5 |
| KBP.AS.779 | <i>Brevibacterium frigoritolerans</i> | 25-37 | 7-12 | 15 | <2 | 20 | <2 | <0.5 |
| KBP.AS.780 | <i>Micrococcus</i> sp.                | 25-37 | 7-11 | <2 | 20 | 20 | 15 | <0.5 |
| KBP.AS.781 | <i>Kocuria</i> sp.                    | 25-37 | 4-12 | 20 | 20 | 15 | <2 | 15   |
| KBP.AS.782 | <i>Labeledella</i> sp.                | 25-25 | 7-11 | <2 | <2 | <2 | <2 | <0.5 |
| KBP.AS.783 | <i>Plantibacter</i> sp.               | 10-45 | 6-12 | 20 | 20 | 20 | <2 | 15   |
| KBP.AS.784 | <i>Arthrobacter agilis</i>            | 10-25 | 3-12 | 20 | 20 | 20 | <2 | 15   |
| KBP.AS.785 | <i>Microbacterium</i> sp.             | 10-25 | 3-12 | 20 | 15 | 20 | <2 | 15   |
| KBP.AS.786 | <i>Pseudarthrobacter</i> sp.          | 25-25 | 7-11 | <2 | <2 | <2 | 15 | 15   |
| KBP.AS.787 | <i>Massilia</i> sp.                   | 10-37 | 7-12 | 15 | 20 | <2 | <2 | <0.5 |
| KBP.AS.788 | <i>Bacillus</i> sp.                   | 2-25  | 6-12 | 15 | 15 | 20 | <2 | 15   |
| KBP.AS.789 | <i>Burkholderia</i> sp.               | 10-45 | 4-12 | 15 | 20 | 20 | <2 | 5    |
| KBP.AS.790 | <i>Cellulomonas hominis</i>           | 25-37 | 7-12 | 15 | 10 | 20 | <2 | 5    |
| KBP.AS.791 | <i>Pseudarthrobacter</i> sp.          | 25-25 | 7-12 | 15 | 20 | 20 | <2 | 10   |
| KBP.AS.792 | <i>Massilia</i> sp.                   | 25-25 | 7-11 | <2 | <2 | <2 | 15 | 10   |
| KBP.AS.793 | <i>Salinibacterium</i> sp.            | 10-45 | 4-12 | 15 | 20 | 20 | 15 | 15   |
| KBP.AS.794 | <i>Arthrobacter</i> sp.               | 10-25 | 6-12 | 5  | 2  | 20 | <2 | <0.5 |
| KBP.AS.795 | <i>Arthrobacter</i> sp.               | 2-37  | 4-11 | 20 | 20 | 20 | 20 | 15   |
| KBP.AS.816 | <i>Arthrobacter</i> sp.               | 25-25 | 7-11 | <2 | <2 | <2 | <2 | 15   |
| KBP.AS.842 | <i>Massilia</i> sp.                   | 25-25 | 7-11 | <2 | <2 | <2 | <2 | <0.5 |
| KBP.AS.843 | <i>Mycetocola</i> sp.                 | 25-50 | 7-11 | <2 | 20 | <2 | <2 | <0.5 |

|            |                                             |       |      |    |    |    |    |      |
|------------|---------------------------------------------|-------|------|----|----|----|----|------|
| KBP.AS.844 | <i>Arthrobacter agilis</i>                  | 25-50 | 7-11 | <2 | 20 | 15 | <2 | 0.5  |
| KBP.AS.845 | <i>Streptomyces</i> sp.                     | 10-25 | 7-12 | 20 | 20 | 20 | <2 | 10   |
| KBP.AS.846 | <i>Arthrobacter</i> sp.                     | 25-50 | 7-11 | <2 | 20 | 20 | 15 | 1    |
| KBP.AS.847 | <i>Cellulomonas</i> sp.                     | 25-25 | 3-12 | 20 | 15 | 20 | <2 | 15   |
| KBP.AS.848 | <i>Massilia</i> sp.                         | 25-25 | 7-11 | <2 | <2 | <2 | <2 | 10   |
| KBP.AS.849 | <i>Microbacterium</i> sp.                   | 10-25 | 7-12 | 5  | 20 | 20 | <2 | 10   |
| KBP.AS.850 | <i>Massilia</i> sp.                         | 10-25 | 3-12 | 15 | 15 | 20 | <2 | 15   |
| KBP.AS.854 | <i>Paracoccus marcusii</i>                  | 25-25 | 7-11 | <2 | <2 | <2 | <2 | <0.5 |
| KBP.AS.855 | <i>Rufibacter</i> sp.                       | 10-45 | 4-12 | 20 | 20 | 20 | 20 | 15   |
| KBP.AS.858 | <i>Arthrobacter crystallopoietes</i>        | 4-45  | 4-12 | 20 | 20 | 20 | <2 | 15   |
| KBP.AS.862 | <i>Arthrobacter</i> sp.                     | 2-45  | 3-12 | 20 | 20 | 20 | 20 | 15   |
| KBP.AS.866 | <i>Sphingomonas</i> sp.                     | 25-37 | 6-12 | 2  | 15 | 15 | <2 | 5    |
| KBP.AS.867 | <i>Microbacterium paraoxydans</i>           | 4-45  | 3-12 | 20 | 20 | 20 | <2 | 15   |
| KBP.AS.868 | <i>Pseudarthrobacter</i> sp.                | 10-45 | 4-12 | 15 | 20 | 20 | 15 | 5    |
| KBP.AS.869 | <i>Kocuria</i> sp.                          | 10-45 | 3-12 | 20 | 20 | 20 | 15 | 15   |
| KBP.AS.876 | <i>Arthrobacter agilis</i>                  | 10-25 | 7-12 | <2 | <2 | <2 | <2 | <0.5 |
| KBP.AS.877 | <i>Salinibacterium</i> sp.                  | 25-37 | 7-12 | 5  | 15 | 20 | <2 | <0.5 |
| KBP.AS.899 | <i>Streptomyces</i> sp.                     | 25-45 | 6-12 | 15 | 15 | 20 | <2 | 10   |
| KBP.AS.916 | <i>Planomicrobium glaciei</i>               | 25-25 | 7-11 | <2 | <2 | <2 | <2 | 10   |
| KBP.AS.926 | <i>Sphingomonas</i> sp.                     | 25-25 | 7-12 | 20 | 20 | 20 | <2 | 15   |
| KBP.AS.927 | <i>Arthrobacter agilis</i>                  | 10-25 | 6-12 | 10 | 15 | 20 | <2 | 5    |
| KBP.AS.928 | <i>Massilia</i> sp.                         | 2-25  | 6-12 | 5  | 15 | 20 | <2 | <0.5 |
| KBP.AS.929 | <i>Pseudarthrobacter</i> sp.                | 25-25 | 7-11 | <2 | <2 | <2 | <2 | 10   |
| KBP.AS.930 | <i>Pseudarthrobacter</i> sp.                | 25-37 | 7-12 | 20 | 20 | 20 | <2 | 10   |
| KBP.AS.931 | <i>Arthrobacter</i> sp.                     | 25-25 | 7-11 | <2 | <2 | <2 | <2 | 10   |
| KBP.AS.932 | <i>Pseudarthrobacter</i> sp.                | 2-25  | 6-12 | 15 | 20 | 20 | <2 | 10   |
| KBP.AS.936 | <i>Pseudarthrobacter phenanthrenivorans</i> | 10-25 | 3-12 | 20 | 20 | 20 | <2 | 15   |
| KBP.AS.937 | <i>Arthrobacter agilis</i>                  | 10-25 | 6-12 | 15 | 15 | 20 | 15 | <0.5 |
| KBP.AS.938 | <i>Streptomyces</i> sp.                     | 10-37 | 4-12 | 5  | 2  | 20 | <2 | <0.5 |
| KBP.AS.939 | <i>Massilia</i> sp.                         | 10-25 | 3-12 | 15 | 15 | 20 | <2 | 15   |
| KBP.AS.940 | <i>Microbacterium</i> sp.                   | 25-25 | 3-12 | 5  | 15 | 20 | <2 | 15   |
| KBP.AS.941 | <i>Pseudarthrobacter</i> sp.                | 25-25 | 7-11 | <2 | <2 | <2 | <2 | <0.5 |

|             |                                 |       |      |       |    |    |    |      |
|-------------|---------------------------------|-------|------|-------|----|----|----|------|
| KBP.AS.943  | <i>Arthrobacter agilis</i>      | 10-25 | 7-11 | 15    | <2 | 15 | <2 | <0.5 |
| KBP.AS.947  | <i>Microbacterium</i> sp.       | 25-25 | 7-11 | <2    | <2 | <2 | <2 | <0.5 |
| KBP.AS.954  | <i>Microbacterium</i> sp.       | 25-25 | 7-12 | 5     | 15 | 20 | <2 | <0.5 |
| KBP.AS.955  | <i>Pseudarthrobacter</i> sp.    | 25-25 | 7-11 | <2    | <2 | <2 | <2 | 10   |
| KBP.AS.956  | <i>Planomicrobium</i> sp        | 25-25 | 7-12 | 15    | 15 | 20 | <2 | 15   |
| KBP.AS.957  | <i>Arthrobacter</i> sp.         | 10-25 | 7-12 | 5     | <2 | <2 | <2 | <0.5 |
| KBP.AS.958  | <i>Arthrobacter</i> sp.         | 2-25  | 6-12 | 15    | 15 | 20 | <2 | 10   |
| KBP.AS.960  | <i>Microbacterium</i> sp.       | 25-25 | 7-11 | <2    | <2 | <2 | <2 | 15   |
| KBP.AS.961  | <i>Cellulomonas</i> sp.         | 10-37 | 6-12 | 15    | 20 | 20 | <2 | 15   |
| KBP.AS.962  | <i>Streptomyces</i> sp.         | 2-25  | 4-12 | 20    | 20 | 20 | 20 | 15   |
| KBP.AS.963  | <i>Arthrobacter agilis</i>      | 10-25 | 6-12 | 20    | 20 | 20 | 15 | 15   |
| KBP.AS.972  | <i>Micrococcus</i> sp.          | 10-37 | 6-12 | 15    | 15 | 20 | <2 | 5    |
| KBP.AS.973  | <i>Rhodococcus erythropolis</i> | 25-37 | 7-12 | 15    | 15 | 20 | <2 | 10   |
| KBP.AS.1003 | <i>Arthrobacter</i> sp.         | 10-25 | 3-12 | 20    | 20 | 20 | <2 | 15   |
| KBP.AS.1005 | <i>Leucobacter aridicollis</i>  | 10-25 | 3-12 | 20    | 20 | 20 | <2 | 15   |
| KBP.AS.1007 | <i>Arthrobacter</i> sp.         | 2-25  | 3-12 | 15    | 15 | 20 | <2 | 15   |
| KBP.AS.1008 | <i>Planomicrobium glaciei</i>   | 25-25 | 3-12 | 20    | 15 | 20 | <2 | 15   |
| KBP.AS.1009 | <i>Pseudarthrobacter</i> sp.    | 10-25 | 3-12 | 20    | 20 | 20 | <2 | 15   |
| KBP.AS.1010 | <i>Planomicrobium glaciei</i>   | 2-25  | 3-12 | 20    | 15 | 20 | <2 | 15   |
| KBP.AS.1011 | <i>Arthrobacter</i> sp.         | 2-25  | 3-12 | 20    | 20 | 20 | <2 | 15   |
| KBP.AS.1012 | <i>Planomicrobium</i> sp        | 10-25 | 3-12 | 15    | 15 | 20 | <2 | 15   |
| KBP.AS.1021 | <i>Arthrobacter agilis</i>      | 2-25  | 3-12 | 15    | 20 | 20 | <2 | 15   |
| KBP.AS.1024 | <i>Arthrobacter</i> sp.         | 25-25 | 3-12 | 5     | 15 | 20 | <2 | 15   |
| KBP.AS.1026 | <i>Massilia</i> sp.             | 2-25  | 3-12 | 15    | 15 | 20 | <2 | 15   |
| KBP.AS.1028 | <i>Agrococcus</i> sp.           | 10-25 | 3-12 | 15,00 | 15 | 20 | <2 | 15   |
| KBP.AS.1029 | <i>Arthrobacter</i> sp.         | 10-25 | 3-12 | 20    | 20 | 20 | <2 | 15   |
| KBP.AS.1030 | <i>Pseudarthrobacter</i> sp.    | 10-25 | 3-12 | 15    | 15 | 20 | <2 | 15   |
| KBP.AS.1031 | <i>Massilia</i> sp.             | 25-25 | 3-12 | 15    | 5  | 20 | <2 | 15   |
| KBP.AS.1032 | <i>Arthrobacter</i> sp.         | 10-25 | 3-12 | 15    | 15 | 20 | <2 | 15   |
| KBP.AS.1033 | <i>Microbacterium</i> sp.       | 10-25 | 3-12 | 15    | 15 | 20 | <2 | 15   |
| KBP.AS.1037 | <i>Massilia</i> sp.             | 25-25 | 3-12 | 15    | 20 | 20 | <2 | 15   |
| KBP.AS.1044 | <i>Pontibacter</i> sp.          | 2-25  | 3-12 | 20    | 20 | 20 | <2 | 15   |

Yellow strain highlight indicates cultures, which are resistant to 70% and more tests.
