# Supplementary material
Source: MDPI journal article supplement (https://www.mdpi.com/2076-3263/9/4/166)
Supplement: s1 [file s1]

**Table S2.** Antibiotic resistance spectra of isolated strains.

| Strain     | Taxonomic affiliation            | Antibiotics, 100 mkg/ml |     |     |      |     |     |      |
|------------|----------------------------------|-------------------------|-----|-----|------|-----|-----|------|
|            |                                  | Amp                     | Chl | Rif | Tetr | Kan | Dox | Ceph |
| KBP.AS.17  | <i>Pseudarthrobacter oxydans</i> | R                       | S   | S   | S    | S   | S   | R    |
| KBP.AS.62  | <i>Arthrobacter</i> sp.          | S                       | S   | S   | R    | R   | S   | S    |
| KBP.AS.75  | <i>Brachybacterium</i> sp.       | S                       | S   | S   | S    | S   | S   | S    |
| KBP.AS.105 | <i>Janthinobacterium</i> sp.     | S                       | S   | S   | S    | S   | S   | S    |
| KBP.AS.160 | <i>Arthrobacter</i> sp.          | R                       | S   | S   | R    | R   | S   | S    |
|            | <i>Microbacterium</i>            |                         |     |     |      |     |     |      |
| KBP.AS.747 | <i>aurantiacum</i>               | S                       | S   | S   | R    | S   | S   | R    |
| KBP.AS.748 | <i>Pseudarthrobacter</i> sp.     | S                       | S   | S   | S    | S   | S   | S    |
|            | <i>Brevibacterium</i>            |                         |     |     |      |     |     |      |
| KBP.AS.749 | <i>frigoritolerans</i>           | S                       | S   | S   | S    | S   | S   | S    |
|            | <i>Planomicrobium</i>            |                         |     |     |      |     |     |      |
| KBP.AS.750 | <i>okeanokoites</i>              | S                       | S   | S   | R    | S   | S   | S    |
| KBP.AS.751 | <i>Agrococcus</i> sp.            | S                       | S   | S   | S    | S   | S   | S    |
| KBP.AS.752 | <i>Agrococcus</i> sp.            | S                       | S   | S   | S    | S   | S   | S    |
| KBP.AS.753 | <i>Agrococcus</i> sp.            | S                       | S   | S   | S    | S   | S   | S    |
| KBP.AS.754 | <i>Kocuria</i> sp.               | S                       | S   | S   | S    | S   | S   | S    |
| KBP.AS.755 | <i>Planomicrobium glaciei</i>    | S                       | S   | S   | S    | S   | S   | S    |
| KBP.AS.756 | <i>Leucobacter aridicollis</i>   | S                       | S   | S   | S    | S   | S   | S    |
|            | <i>Planomicrobium</i>            |                         |     |     |      |     |     |      |
| KBP.AS.757 | <i>okeanokoites</i>              | S                       | S   | S   | S    | S   | S   | S    |
| KBP.AS.758 | <i>Microbacterium</i> sp.        | R                       | S   | S   | R    | R   | S   | S    |
| KBP.AS.759 | <i>Bacillus pumilus</i>          | R                       | S   | S   | R    | R   | S   | S    |
| KBP.AS.760 | <i>Microbacterium</i> sp.        | S                       | S   | S   | S    | R   | S   | S    |
| KBP.AS.761 | <i>Rufibacter</i> sp.            | S                       | S   | S   | S    | S   | S   | S    |
| KBP.AS.762 | <i>Microbacterium</i> sp.        | S                       | S   | S   | S    | S   | S   | S    |
| KBP.AS.763 | <i>Massilia</i> sp.              | S                       | S   | S   | S    | S   | S   | S    |
| KBP.AS.764 | <i>Bacillus</i> sp.              | R                       | S   | S   | S    | S   | S   | S    |
| KBP.AS.765 | <i>Massilia alkalitolerans</i>   | S                       | S   | S   | S    | S   | S   | S    |
| KBP.AS.766 | <i>Pseudarthrobacter</i> sp.     | R                       | S   | S   | S    | S   | S   | S    |
| KBP.AS.767 | <i>Massilia varians</i>          | S                       | S   | S   | S    | S   | S   | S    |
| KBP.AS.768 | <i>Planomicrobium</i> sp         | R                       | S   | S   | S    | S   | R   | S    |
|            | <i>Microbacterium</i>            |                         |     |     |      |     |     |      |
| KBP.AS.769 | <i>pseudoresistens</i>           | S                       | S   | S   | S    | S   | S   | S    |
| KBP.AS.770 | <i>Arthrobacter</i> sp.          | S                       | S   | S   | S    | R   | S   | S    |
| KBP.AS.771 | <i>Arthrobacter</i> sp.          | R                       | S   | S   | S    | R   | S   | R    |
| KBP.AS.772 | <i>Planomicrobium glaciei</i>    | S                       | S   | S   | S    | S   | S   | S    |
| KBP.AS.773 | <i>Cellulomonas</i> sp.          | S                       | S   | S   | S    | R   | S   | R    |
|            | <i>Planomicrobium</i>            |                         |     |     |      |     |     |      |
| KBP.AS.774 | <i>okeanokoites</i>              | R                       | S   | S   | R    | R   | S   | S    |
|            | <i>Planomicrobium</i>            |                         |     |     |      |     |     |      |
| KBP.AS.775 | <i>okeanokoites</i>              | S                       | S   | S   | S    | S   | S   | R    |
| KBP.AS.776 | <i>Georgenia</i> sp.             | R                       | S   | S   | R    | S   | S   | S    |
| KBP.AS.777 | <i>Microbacterium barkeri</i>    | S                       | S   | S   | R    | S   | S   | S    |
| KBP.AS.778 | <i>Salinibacterium</i> sp.       | S                       | S   | S   | S    | S   | S   | S    |
|            | <i>Brevibacterium</i>            |                         |     |     |      |     |     |      |
| KBP.AS.779 | <i>frigoritolerans</i>           | S                       | S   | S   | S    | S   | S   | S    |
| KBP.AS.780 | <i>Micrococcus</i> sp.           | S                       | S   | S   | S    | S   | S   | S    |

|            |                                             |   |   |   |   |   |   |   |
|------------|---------------------------------------------|---|---|---|---|---|---|---|
| KBP.AS.781 | <i>Kocuria</i> sp.                          | S | S | S | S | R | S | S |
| KBP.AS.782 | <i>Labedella</i> sp.                        | S | S | S | S | S | S | S |
| KBP.AS.783 | <i>Plantibacter</i> sp.                     | R | S | S | S | S | S | S |
| KBP.AS.784 | <i>Arthrobacter agilis</i>                  | R | S | S | S | S | S | R |
| KBP.AS.785 | <i>Microbacterium</i> sp.                   | R | S | S | R | S | S | R |
| KBP.AS.786 | <i>Pseudarthrobacter</i> sp.                | S | S | S | S | S | S | S |
| KBP.AS.787 | <i>Massilia</i> sp.                         | S | S | S | S | S | S | S |
| KBP.AS.788 | <i>Bacillus</i> sp.                         | R | S | S | R | R | R | R |
| KBP.AS.789 | <i>Burkholderia</i> sp.                     | S | S | S | R | R | S | S |
| KBP.AS.790 | <i>Cellulomonas hominis</i>                 | S | S | S | S | S | S | S |
| KBP.AS.791 | <i>Pseudarthrobacter</i> sp.                | S | S | S | S | S | S | S |
| KBP.AS.792 | <i>Massilia</i> sp.                         | S | S | S | S | S | S | S |
| KBP.AS.793 | <i>Salinibacterium</i> sp.                  | S | S | S | S | R | S | S |
| KBP.AS.794 | <i>Arthrobacter</i> sp.                     | S | S | S | S | S | S | R |
| KBP.AS.795 | <i>Arthrobacter</i> sp.                     | R | S | S | S | R | S | S |
| KBP.AS.816 | <i>Arthrobacter</i> sp.                     | S | S | S | S | S | S | S |
| KBP.AS.842 | <i>Massilia</i> sp.                         | S | S | S | S | S | S | S |
| KBP.AS.843 | <i>Mycetocola</i> sp.                       | S | S | S | S | S | S | S |
| KBP.AS.844 | <i>Arthrobacter agilis</i>                  | S | S | S | S | S | S | S |
| KBP.AS.845 | <i>Streptomyces</i> sp.                     | S | S | S | S | S | S | S |
| KBP.AS.846 | <i>Arthrobacter</i> sp.                     | S | S | S | S | S | S | S |
| KBP.AS.847 | <i>Cellulomonas</i> sp.                     | R | S | S | R | S | S | R |
| KBP.AS.848 | <i>Massilia</i> sp.                         | S | S | S | S | S | S | S |
| KBP.AS.849 | <i>Microbacterium</i> sp.                   | S | S | S | S | S | S | S |
| KBP.AS.850 | <i>Massilia</i> sp.                         | R | S | S | R | S | S | S |
| KBP.AS.854 | <i>Paracoccus marcusii</i>                  | S | S | S | S | S | S | S |
| KBP.AS.855 | <i>Rufibacter</i> sp.                       | R | S | S | S | R | S | S |
| KBP.AS.858 | <i>Arthrobacter crystallopoietes</i>        | S | S | S | R | R | S | S |
| KBP.AS.862 | <i>Arthrobacter</i> sp.                     | R | S | S | S | R | S | S |
| KBP.AS.866 | <i>Sphingomonas</i> sp.                     | S | S | S | R | S | S | S |
| KBP.AS.867 | <i>Microbacterium paraoxydans</i>           | R | S | S | R | R | S | S |
| KBP.AS.868 | <i>Pseudarthrobacter</i> sp.                | S | S | S | R | R | S | S |
| KBP.AS.869 | <i>Kocuria</i> sp.                          | S | S | S | S | R | R | S |
| KBP.AS.876 | <i>Arthrobacter agilis</i>                  | S | S | S | S | S | S | S |
| KBP.AS.877 | <i>Salinibacterium</i> sp.                  | S | S | S | S | S | S | S |
| KBP.AS.899 | <i>Streptomyces</i> sp.                     | S | S | S | R | R | S | S |
| KBP.AS.916 | <i>Planomicrobium glaciei</i>               | S | S | S | S | S | S | S |
| KBP.AS.926 | <i>Sphingomonas</i> sp.                     | S | S | S | S | S | S | S |
| KBP.AS.927 | <i>Arthrobacter agilis</i>                  | S | S | S | S | S | S | S |
| KBP.AS.928 | <i>Massilia</i> sp.                         | S | S | S | R | R | S | S |
| KBP.AS.929 | <i>Pseudarthrobacter</i> sp.                | S | S | S | S | S | S | S |
| KBP.AS.930 | <i>Pseudarthrobacter</i> sp.                | S | S | S | S | S | S | S |
| KBP.AS.931 | <i>Arthrobacter</i> sp.                     | S | S | S | S | S | S | S |
| KBP.AS.932 | <i>Pseudarthrobacter</i> sp.                | S | S | S | S | S | S | S |
| KBP.AS.936 | <i>Pseudarthrobacter phenanthrenivorans</i> | R | S | S | R | S | S | R |
| KBP.AS.937 | <i>Arthrobacter agilis</i>                  | S | S | S | S | S | S | R |
| KBP.AS.938 | <i>Streptomyces</i> sp.                     | S | S | S | S | S | S | R |
| KBP.AS.939 | <i>Massilia</i> sp.                         | R | S | S | R | S | S | R |
| KBP.AS.940 | <i>Microbacterium</i> sp.                   | S | S | S | R | S | S | R |
| KBP.AS.941 | <i>Pseudarthrobacter</i> sp.                | S | S | S | S | S | S | S |
| KBP.AS.943 | <i>Arthrobacter agilis</i>                  | S | S | S | S | S | S | S |

|             |                                 |   |   |   |   |   |   |   |
|-------------|---------------------------------|---|---|---|---|---|---|---|
| KBP.AS.947  | <i>Microbacterium</i> sp.       | S | S | S | S | S | S | S |
| KBP.AS.954  | <i>Microbacterium</i> sp.       | S | S | S | S | S | S | S |
| KBP.AS.955  | <i>Pseudarthrobacter</i> sp.    | S | S | S | S | S | S | S |
| KBP.AS.956  | <i>Planomicrobium</i> sp.       | S | S | S | S | S | S | S |
| KBP.AS.957  | <i>Arthrobacter</i> sp.         | S | S | S | S | S | S | S |
| KBP.AS.958  | <i>Arthrobacter</i> sp.         | S | S | S | S | S | S | S |
| KBP.AS.960  | <i>Microbacterium</i> sp.       | R | S | S | S | S | S | S |
| KBP.AS.961  | <i>Cellulomonas</i> sp.         | R | S | S | R | S | S | R |
| KBP.AS.962  | <i>Streptomyces</i> sp.         | R | S | S | S | S | S | S |
| KBP.AS.963  | <i>Arthrobacter agilis</i>      | S | S | S | S | S | S | R |
| KBP.AS.972  | <i>Micrococcus</i> sp.          | S | S | S | S | S | S | R |
| KBP.AS.973  | <i>Rhodococcus erythropolis</i> | S | S | S | S | S | S | S |
| KBP.AS.1003 | <i>Arthrobacter</i> sp.         | R | R | S | R | S | S | R |
| KBP.AS.1005 | <i>Leucobacter aridicollis</i>  | R | R | S | R | R | S | R |
| KBP.AS.1007 | <i>Arthrobacter</i> sp.         | R | S | S | R | S | S | R |
| KBP.AS.1008 | <i>Planomicrobium glaciei</i>   | R | R | S | R | S | S | R |
| KBP.AS.1009 | <i>Pseudarthrobacter</i> sp.    | R | R | S | R | S | S | R |
| KBP.AS.1010 | <i>Planomicrobium glaciei</i>   | R | S | S | R | S | S | R |
| KBP.AS.1011 | <i>Arthrobacter</i> sp.         | R | R | S | S | S | S | R |
| KBP.AS.1012 | <i>Planomicrobium</i> sp.       | R | R | S | R | S | S | R |
| KBP.AS.1021 | <i>Arthrobacter agilis</i>      | R | S | S | R | S | S | S |
| KBP.AS.1024 | <i>Arthrobacter</i> sp.         | R | S | S | R | S | S | R |
| KBP.AS.1026 | <i>Massilia</i> sp.             | R | R | S | R | S | S | R |
| KBP.AS.1028 | <i>Agrococcus</i> sp.           | R | S | S | R | S | S | R |
| KBP.AS.1029 | <i>Arthrobacter</i> sp.         | R | R | S | R | S | S | R |
| KBP.AS.1030 | <i>Pseudarthrobacter</i> sp.    | R | R | S | R | S | S | R |
| KBP.AS.1031 | <i>Massilia</i> sp.             | R | R | S | R | S | S | R |
| KBP.AS.1032 | <i>Arthrobacter</i> sp.         | R | R | S | R | S | S | R |
| KBP.AS.1033 | <i>Microbacterium</i> sp.       | R | R | S | R | S | S | R |
| KBP.AS.1037 | <i>Massilia</i> sp.             | R | S | S | R | S | S | R |
| KBP.AS.1044 | <i>Pontibacter</i> sp.          | R | R | S | R | S | S | R |

Yellow strain highlight indicates cultures, which are resistant to 70% and more tests. R means Resistant, S means Sensitive. Abbreviations: *Amp* – Ampicillin, *Chl* – Chloramphenicol, *Rif* – Rifampicin, *Tetr* – Tetracycline, *Kan* – Kanamycin, *Dox* – Doxycycline, *Ceph* – Cephalexin.
