# Supplementary material
Source: MDPI journal article supplement (https://www.mdpi.com/2076-3263/9/4/166)

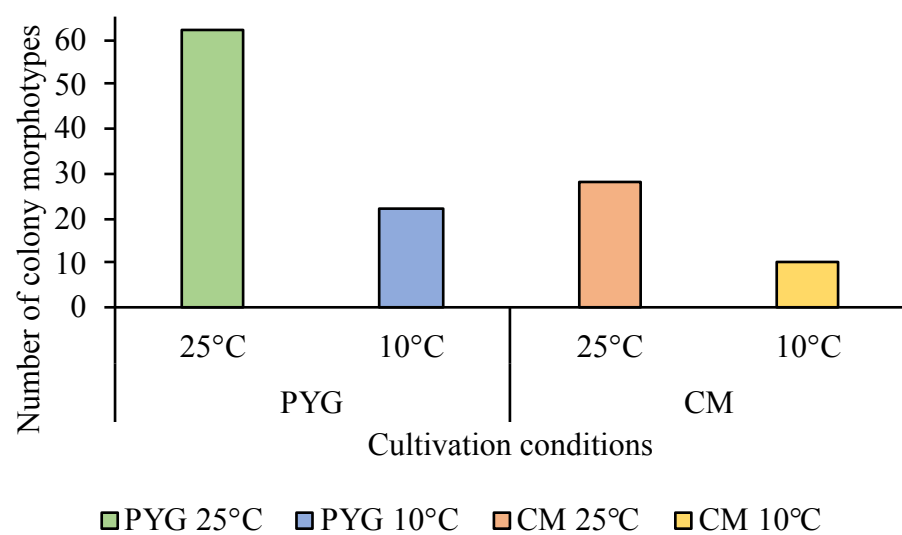

**Figure S1.** Number of colonies morphotypes in the communities studied.

Supplement: s1 [file s1]
